# Supplementary material
Source: PubMed Central journal article supplement (PMC4343291)
Supplement: supp_mcu256_aob-14505-s01.pdf [file supp_mcu256_aob-14505-s01.pdf]

## SUPPLEMENTARY DATA

Fig. S1. Delta- $K$  values from 20 replicates of STRUCTURE analysis calculated by StrutureHarvester, for  $K$  from 1 to 8.

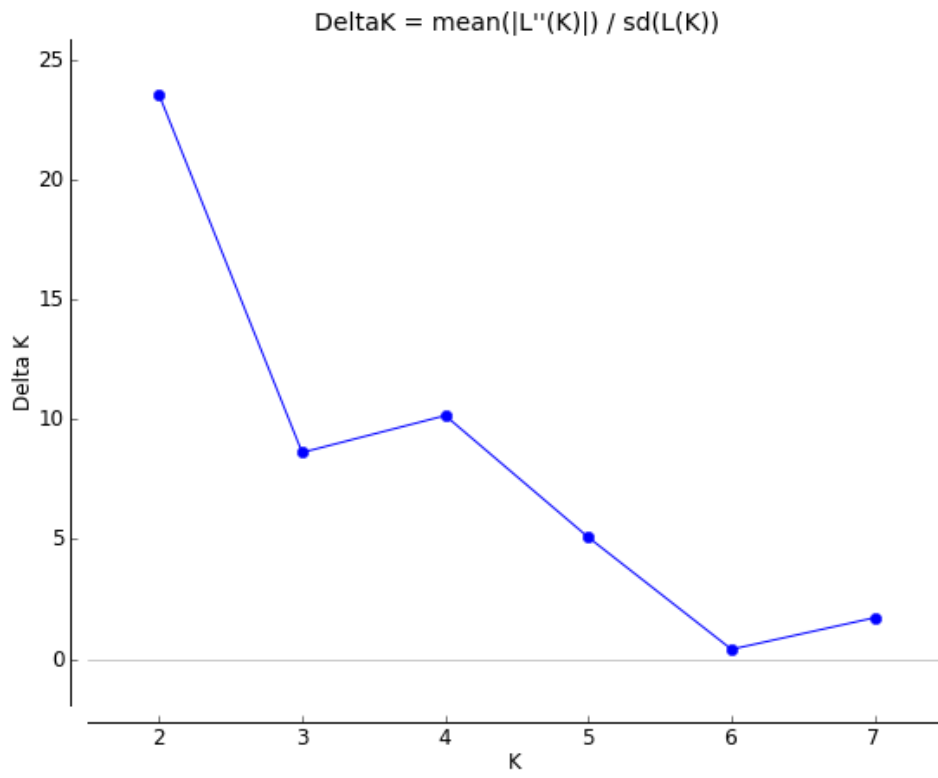

Fig. S2. Probabilities of unassigned pollen genotypes to belong to STRUCTURE-inferred clusters estimated by GeneClass2.

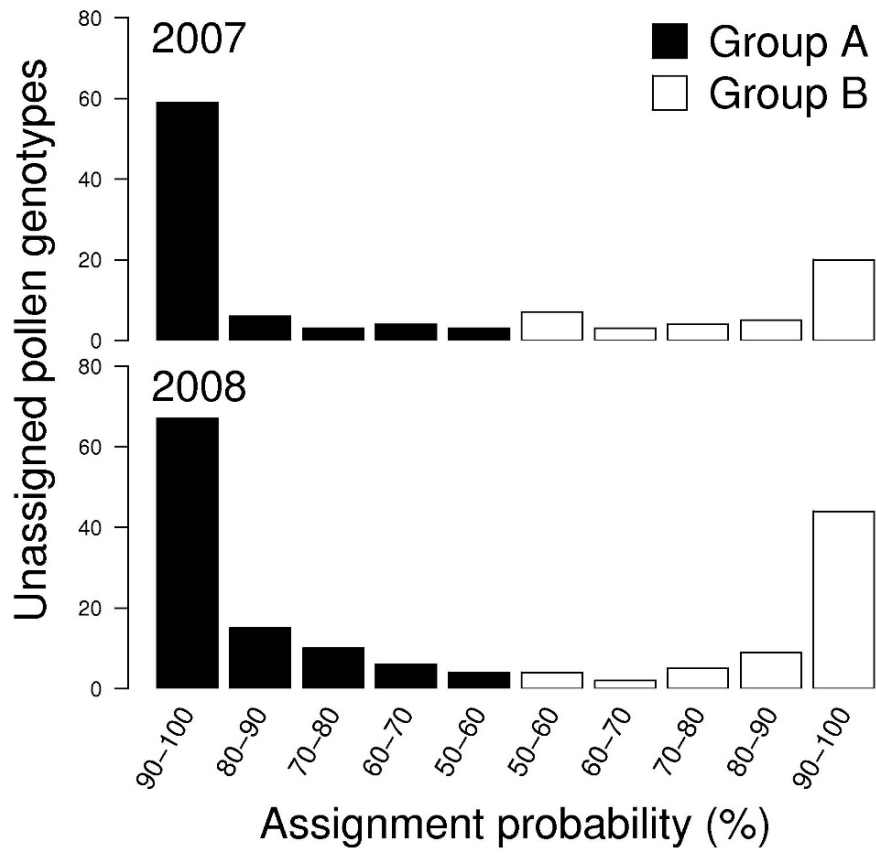

Table S1. Characteristics of the marker set.

| Locus     | Primer sequence                                     | Repeat motif                                                 | $T_a$ | Dye   | Reference                  |
|-----------|-----------------------------------------------------|--------------------------------------------------------------|-------|-------|----------------------------|
| UR123     | F:AGCAATAAACCTTGTGTCGTG<br>R: GAGCTTGCTATGCTTCGTCTC | (CA) <sub>4</sub> CG (CA) <sub>5</sub><br>(TTA) <sub>5</sub> | 60°C  | HEX   | Zalapa <i>et al.</i> 2008  |
| UR138     | F: CTAGAACCCCTTCGAAACC<br>R: ACAAAAAGCCCACACACCTC   | (GA) <sub>8</sub>                                            | 60°C  | TAMRA | Zalapa <i>et al.</i> 2008  |
| UR158     | F: TTCTTCATAGGCGCTGAGGT<br>R: TGCACCCTGTCAAAGCTAAA  | (TGTA) <sub>5</sub>                                          | 55°C  | TAMRA | Zalapa <i>et al.</i> 2008  |
| UR188a    | F: AAAACTAACGCGTCCCTTCC<br>R: ATTCGCTTCAATTGCGAG    | (AC) <sub>15</sub>                                           | 55°C  | TAMRA | Zalapa <i>et al.</i> 2008  |
| Ulmi1-21  | F: GCGGTCTTACGTGAGCTTTC<br>R: AAAGAGGCAGACGAAGATGG  | (CT) <sub>10</sub>                                           | 55°C  | FAM   | Collada <i>et al.</i> 2004 |
| Ulmi1-165 | F: CTCTTCCATTCGTCTCACC<br>R: GAGGTGCCATAAGCCAAGAA   | (CT) <sub>9</sub>                                            | 55°C  | FAM   | Collada <i>et al.</i> 2004 |

$T_a$ , annealing temperature.

Table S2. Correspondence between morphological classification and genetic clustering. The number of individuals morphologically classified as *U. minor*, *U. pumila* and hybrids assigned to each STRUCTURE cluster is reported for the Porporana stand and the surrounding area.

| STRUCTURE clusters | Porporana stand |                 |                  | Surrounding area |                 |                  |
|--------------------|-----------------|-----------------|------------------|------------------|-----------------|------------------|
|                    | Hybrids         | <i>U. minor</i> | <i>U. pumila</i> | Hybrids          | <i>U. minor</i> | <i>U. pumila</i> |
| A                  | 0               | 69              | 0                | 8                | 32              | 17               |
| B                  | 0               | 191             | 0                | 0                | 4               | 2                |
| M                  | 0               | 90              | 0                | 3                | 20              | 3                |

Table S3. Hybrid detection analysis with STRUCTURE. Probabilities that a tree is from, or has ancestry in, the clusters inferred by first STRUCTURE analysis aimed at investigating the genetic structure in the study population.

| STRUCTURE clusters | Ancestry in A | Ancestry in B |
|--------------------|---------------|---------------|
| A                  | 0.994         | 0.006         |
| B                  | 0.005         | 0.995         |
| M                  | 0.494         | 0.506         |

Table S4. Hybrid detection analysis with NEWHYBRIDS. Number of individuals assigned to purebreds (P0 and P1) or to hybrid categories.

| Analysis                           | STRUCTURE clusters | P0  | P1  | Hybrids | Unassigned |
|------------------------------------|--------------------|-----|-----|---------|------------|
| NEWHYBRIDS<br>Prior information    | A                  | 120 | 0   | 0       | 6          |
|                                    | B                  | 0   | 197 | 0       | 0          |
|                                    | M                  | 1   | 59  | 1       | 55         |
| NEWHYBRIDS<br>No prior information | A                  | 41  | 34  | 9       | 42         |
|                                    | B                  | 0   | 196 | 0       | 1          |
|                                    | M                  | 0   | 91  | 9       | 16         |

Table S5. Genetic diversity parameters locus by locus for the entire dataset (439 individuals) and the Porporana stand only (350 individuals) calculated by GenAlEx (Peakall and Smouse, 2012). EP was calculated according to Jamieson and Taylor (1997) formulae by FaMoz (Gerber *et al.*, 2003). Mean inbreeding coefficient in brackets was estimated by InEST (Chybicki and Burczyk, 2009) as well as the frequencies of null alleles.

| Population | All    |       |       |       | Porporana stand |       |       |                                |             |       |
|------------|--------|-------|-------|-------|-----------------|-------|-------|--------------------------------|-------------|-------|
| Locus      | $N_a$  | $H_O$ | $H_E$ | EP    | $N_a$           | $H_O$ | $H_E$ | $F_{IS}$                       | $null_{IM}$ | s.e.  |
| UR123      | 4      | 0.460 | 0.532 | 0.372 | 4               | 0.429 | 0.489 | 0.124                          | 0.056       | 0.020 |
| UR138      | 16     | 0.573 | 0.828 | 0.557 | 14              | 0.596 | 0.847 | 0.296                          | 0.125       | 0.017 |
| UR158      | 7      | 0.707 | 0.751 | 0.580 | 7               | 0.775 | 0.726 | -0.068                         | 0.012       | 0.009 |
| UR188A     | 7      | 0.746 | 0.588 | 0.337 | 5               | 0.796 | 0.581 | -0.370                         | 0.004       | 0.004 |
| Ulmi1-21   | 13     | 0.647 | 0.735 | 0.646 | 13              | 0.621 | 0.701 | 0.115                          | 0.046       | 0.014 |
| Ulmi1-165  | 18     | 0.395 | 0.705 | 0.542 | 16              | 0.402 | 0.682 | 0.411                          | 0.170       | 0.021 |
| Mean       | 10.833 | 0.588 | 0.690 |       | 9.833           | 0.603 | 0.671 | 0.1013<br>(0.002 ± 0.002 s.e.) |             |       |
| Overall    |        |       |       | 0.987 |                 |       |       |                                |             |       |

$N_a$ , number of alleles;  $H_O$ , observed heterozygosity;  $H_E$ , expected heterozygosity; EP, exclusion probability for paternity analysis;  $F_{IS}$ , inbreeding coefficient;  $null_{IM}$ , frequency of null allele.

Table S6. Comparison of pollen immigration estimates obtained by varying FaMoz settings about genotyping error values ( $e$ : 0.01, 0.05 and 0.10) and inbreeding coefficient values ( $F_{IS}$ : 0 and 0.10) on the original and transformed datasets. The pollen immigration estimate from the scenario selected for analyzing pollen dispersal patterns (original dataset,  $F_{IS} = 0.10$ ,  $e = 0.05$ ) is highlighted in bold.

| Dataset     | Inbreeding coefficient | Genotyping error |              |           |
|-------------|------------------------|------------------|--------------|-----------|
|             |                        | $e = 0.01$       | $e = 0.05$   | $e = 0.1$ |
| Original    | $F_{IS} = 0.10$        | 87.56            | <b>77.72</b> | 62.43     |
|             | $F_{IS} = 0$           | 79.79            | 62.18        | 59.07     |
| Transformed | $F_{IS} = 0.10$        | 88.60            | 80.83        | 76.16     |
|             | $F_{IS} = 0$           | 85.23            | 80.05        | 63.21     |

Table S7. Pollen immigration rate for each mother tree in 2007 and 2008. For each mother tree, the number of sampled seeds, its geographical location (in the central Porporana stand or in the surrounding agricultural area) and the genetic cluster to which it was assigned by STRUCTURE analysis are also reported.

| Year | Tree ID | <i>N</i> | Morphological classification | Porporana stand | Genetic cluster | Pollen immigration rate |
|------|---------|----------|------------------------------|-----------------|-----------------|-------------------------|
| 2007 | PO001   | 9        | <i>U. minor</i>              | yes             | A               | 0.89                    |
|      | PO125   | 9        | <i>U. pumila</i>             | no              | A               | 0.67                    |
|      | PO126   | 10       | <i>U. minor</i>              | no              | A               | 0.70                    |
|      | PO129   | 9        | <i>U. minor</i>              | no              | M               | 1.00                    |
|      | PO139   | 10       | <i>U. minor</i>              | no              | A               | 0.90                    |
|      | PO147   | 10       | <i>U. pumila</i>             | no              | B               | 0.70                    |
|      | PO148   | 4        | <i>U. pumila</i>             | no              | A               | 0.75                    |
|      | PO149   | 6        | <i>U. pumila</i>             | no              | M               | 1.00                    |
|      | PO150   | 4        | Hybrid                       | no              | M               | 0.75                    |
|      | PO152   | 6        | <i>U. pumila</i>             | no              | A               | 1.00                    |
|      | PO157   | 8        | <i>U. minor</i>              | no              | M               | 0.88                    |
|      | PO170   | 8        | <i>U. minor</i>              | no              | M               | 1.00                    |
|      | PO173   | 10       | <i>U. minor</i>              | no              | A               | 0.90                    |
|      | PO174   | 6        | <i>U. minor</i>              | no              | M               | 1.00                    |
|      | PO175   | 8        | <i>U. minor</i>              | no              | A               | 0.63                    |
|      | PO182   | 10       | <i>U. pumila</i>             | no              | A               | 0.50                    |
|      | PO187   | 8        | <i>U. pumila</i>             | no              | A               | 0.63                    |
|      | PO193   | 8        | hybrid                       | no              | A               | 0.75                    |
|      | PO198   | 4        | <i>U. minor</i>              | no              | B               | 0.75                    |
|      | PO204   | 10       | <i>U. minor</i>              | no              | M               | 0.60                    |
| 2008 | PO001   | 7        | <i>U. minor</i>              | yes             | A               | 1.00                    |
|      | PO101   | 9        | <i>U. minor</i>              | yes             | A               | 1.00                    |
|      | PO116   | 9        | <i>U. minor</i>              | yes             | M               | 0.67                    |
|      | PO126   | 10       | <i>U. minor</i>              | no              | A               | 0.60                    |
|      | PO129   | 8        | <i>U. minor</i>              | no              | M               | 1.00                    |
|      | PO131   | 10       | <i>U. minor</i>              | no              | M               | 0.70                    |
|      | PO133   | 9        | <i>U. minor</i>              | no              | M               | 0.67                    |
|      | PO134   | 8        | <i>U. pumila</i>             | no              | A               | 1.00                    |
|      | PO139   | 9        | <i>U. minor</i>              | no              | A               | 0.44                    |
|      | PO147   | 7        | <i>U. pumila</i>             | no              | B               | 1.00                    |
|      | PO148   | 5        | <i>U. pumila</i>             | no              | A               | 1.00                    |
|      | PO149   | 8        | <i>U. pumila</i>             | no              | M               | 1.00                    |
|      | PO150   | 8        | hybrid                       | no              | M               | 0.75                    |
|      | PO152   | 2        | <i>U. pumila</i>             | no              | A               | 1.00                    |
|      | PO157   | 9        | <i>U. minor</i>              | no              | M               | 0.89                    |
|      | PO170   | 9        | <i>U. minor</i>              | no              | M               | 0.89                    |
|      | PO173   | 8        | <i>U. minor</i>              | no              | A               | 0.38                    |
|      | PO174   | 6        | <i>U. minor</i>              | no              | M               | 1.00                    |
|      | PO175   | 9        | <i>U. minor</i>              | no              | A               | 0.44                    |
|      | PO182   | 10       | <i>U. pumila</i>             | no              | A               | 0.20                    |
|      | PO183   | 9        | <i>U. pumila</i>             | no              | M               | 1.00                    |
|      | PO185   | 8        | <i>U. minor</i>              | no              | A               | 1.00                    |
|      | PO193   | 10       | hybrid                       | no              | A               | 0.90                    |
|      | PO195   | 9        | <i>U. minor</i>              | no              | M               | 0.89                    |
|      | PO198   | 9        | <i>U. minor</i>              | no              | B               | 0.89                    |
|      | PO200   | 9        | hybrid                       | no              | A               | 0.56                    |
|      | PO202   | 8        | <i>U. minor</i>              | no              | M               | 0.50                    |
|      | PO204   | 7        | <i>U. minor</i>              | no              | M               | 0.71                    |

*N*, number of sampled seeds.

## LITERATURE CITED

- Chybicki IJ, Burczyk J. 2009.** Simultaneous estimation of null alleles and inbreeding coefficients. *Journal of Heredity* **100**: 106–113.
- Collada C, Fuentes-Utrilla P, Gil L, Cervera MT. 2004.** Characterization of microsatellite loci in *Ulmus minor* Miller and cross-amplification in *U. glabra* Hudson and *U. laevis* Pall. *Molecular Ecology Notes* **4**: 731–732.
- Evanno G, Regnaut S, Goudet J. 2005.** Detecting the number of clusters of individuals using the software STRUCTURE: a simulation study. *Molecular Ecology* **14**: 2611–2620.
- Gerber S, Chabrier P, Kremer A. 2003.** FAMOZ: a software for parentage analysis using dominant, codominant and uniparentally inherited markers. *Molecular Ecology Notes* **3**: 479–481.
- Jamieson A, Taylor SS. 1997.** Comparisons of three probability formulae for parentage exclusion. *Animal Genetics* **28**: 397–400.
- Peakall R, Smouse PE. 2012.** GenAlEx 6.5: genetic analysis in Excel. Population genetic software for teaching and research—an update. *Bioinformatics* **28**: 2537–2539.
- Zalapa JE, Brunet J, Guries RP. 2008.** Isolation and characterization of microsatellite markers for red elm (*Ulmus rubra* Muhl.) and cross-species amplification with Siberian elm (*Ulmus pumila* L.). *Molecular Ecology Resources* **8**: 109–112.
